# Supplementary material for: Cysteine Depletion Causes Oxidative Stress and Triggers Outer Membrane Vesicle Release by Neisseria meningitidis; Implications for Vaccine Development
Source: PubMed Central journal article supplement (PMC3553081; doi:10.1371/journal.pone.0054314), 2013-01-23

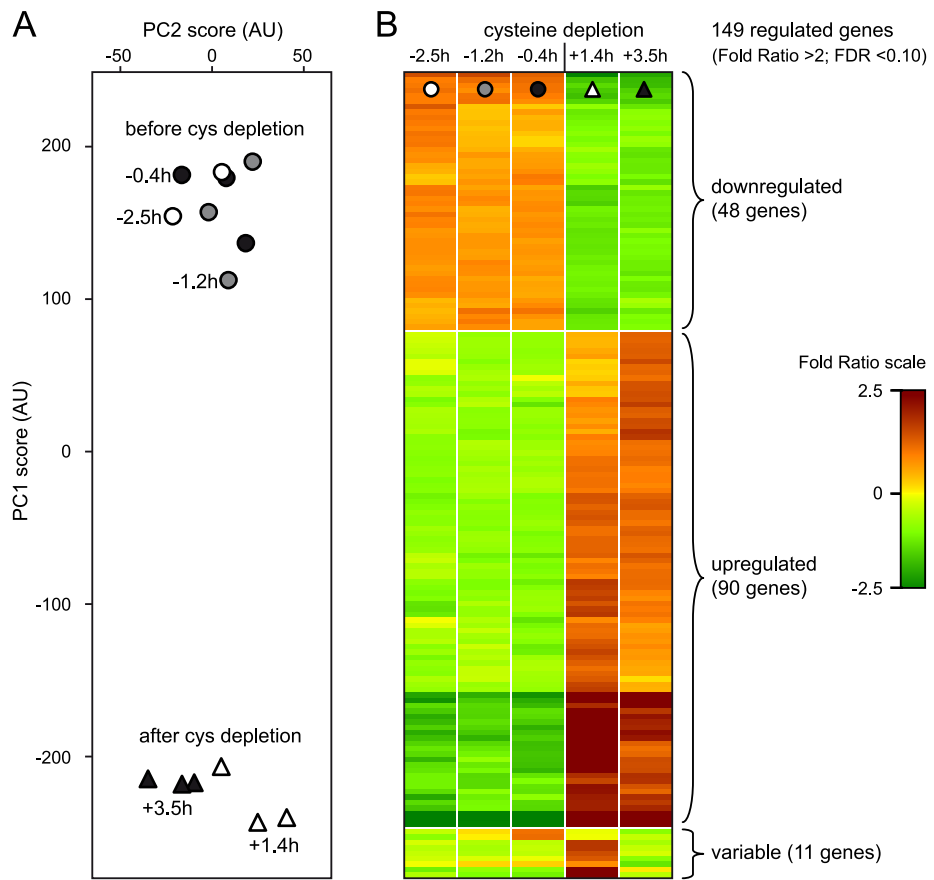

Supplement: pone.0054314.s003.pdf [file pone.0054314.s003.pdf]
